# Supplementary material
Source: HighWire-hosted journal article supplement (http://rc.rcjournal.com/highwire/filestream/28211/field_highwire_adjunct_files/1/rc-11870-File002.docx)
Supplement: rc-11870-File002.docx [file rc-11870-File002.docx]

Table S2. All HRs with 95% CIs for the other covariates included in multivariable models 3

| Variable | | HR (95% CI) | *P*-value |
| --- | --- | --- | --- |
| Age, year | | 1.09 (1.09, 1.09) | <0.001 |
| Sex, male | | 1.60 (1.58, 1.62) | <0.001 |
| Household income level | |  |  |
|  | Medical aid program group | 1.43 (1.40, 1.46) | <0.001 |
|  | Q1 in quartile (lowest) | 1 |  |
|  | Q2 in quartile | 1.00 (0.98, 1.02) | 0.689 |
|  | Q3 in quartile | 0.98 (0.96, 1.00) | 0.016 |
|  | Q4 in quartile (highest) | 0.90 (0.89, 0.92) | <0.001 |
|  | Unknown | 1.04 (0.99, 1.09) | 0.125 |
| Residence | |  |  |
|  | Urban area | 1 |  |
|  | Rural area | 1.29 (1.28, 1.31) | <0.001 |
| Underlying disability | |  |  |
|  | Mild to moderate | 1.25 (1.23, 1.27) | <0.001 |
|  | Severe | 1.95 (1.91, 1.98) | <0.001 |
| Underlying comorbidity | |  |  |
|  | Congestive heart failure | 1.33 (1.30, 1.35) | <0.001 |
|  | Cardiac arrhythmias | 1.13 (1.10, 1.15) | <0.001 |
|  | Valvular disease | 1.25 (1.20, 1.31) | <0.001 |
|  | Pulmonary circulation disorders | 1.46 (1.40, 1.54) | <0.001 |
|  | Peripheral vascular disorders | 0.96 (0.94, 0.97) | <0.001 |
|  | Hypertension, uncomplicated | 0.91 (0.90, 0.94) | <0.001 |
|  | Hypertension, complicated | 0.92 (0.90, 0.94) | <0.001 |
|  | Paralysis | 2.12 (2.06, 2.18) | <0.001 |
|  | Other neurological disorders | 1.52 (1.49, 1.54) | <0.001 |
|  | Chronic pulmonary disease | 1.62 (1.61, 1.64) | <0.001 |
|  | Diabetes, uncomplicated | 1.07 (1.05, 1.08) | <0.001 |
|  | Diabetes, complicated | 1.15 (1.13, 1.16) | <0.001 |
|  | Hypothyroidism | 0.92 (0.90, 0.94) | <0.001 |
|  | Renal failure | 1.25 (1.22, 1.28) | <0.001 |
|  | Liver disease | 0.98 (0.97, 1.00) | 0.052 |
|  | Peptic ulcer disease, excluding bleeding | 0.99 (0.98, 1.01) | 0.213 |
|  | AIDS/HIV | 0.86 (0.70, 1.07) | 0.169 |
|  | Lymphoma | 1.65 (1.52, 1.79) | <0.001 |
|  | Metastatic cancer | 1.38 (1.32, 1.45) | <0.001 |
|  | Solid tumor without metastasis | 1.10 (1.08, 1.12) | <0.001 |
|  | Rheumatoid arthritis/collagen vascular diseases | 1.03 (1.01, 1.05) | 0.015 |
|  | Coagulopathy | 1.10 (1.07, 1.14) | <0.001 |
|  | Obesity | 0.90 (0.71, 1.14) | 0.385 |
|  | Weight loss | 1.25 (1.20, 1.29) | <0.001 |
|  | Fluid and electrolyte disorders | 1.51 (1.48, 1.53) | <0.001 |
|  | Blood loss anemia | 1.21 (1.11, 1.31) | <0.001 |
|  | Deficiency anemia | 1.21 (1.19, 1.23) | <0.001 |
|  | Alcohol abuse | 1.30 (1.26, 1.34) | <0.001 |
|  | Drug abuse | 1.13 (0.95, 1.33) | 0.165 |
|  | Psychoses | 1.82 (1.76, 1.87) | <0.001 |
|  | Depression | 1.32 (1.30, 1.33) | <0.001 |
| Prescription of other analgesics | |  |  |
|  | Paracetamol | 0.80 (0.79, 0.82) | <0.001 |
|  | NSAIDs | 0.91 (0.89, 0.92) | <0.001 |
|  | Gabapentin or pregabalin | 1.04 (1.02, 1.06) | <0.001 |

HR, hazard ratio; CI, confidence interval; AIDS, Acquired immunodeficiency syndrome; HIV, human immunodeficiency virus; NSAIDs, Nonsteroidal anti-inflammatory drugs
